# Supplementary material for: Highly conductive and homogeneous NiOx nanoparticles for stable and efficient flexible perovskite solar cells
Source: Royal Society of Chemistry journal article supplement (doi:10.1039/d4cc06797e), 2025-01-01
Supplement: d4cc06797e1.pdf [file d4cc06797e1.pdf]

## Highly Conductive and Homogeneous NiO<sub>x</sub> Nanoparticles for Stable and Efficient Flexible Perovskite Solar Cells

Junjun Jin,<sup>‡a</sup> Jitao Shang,<sup>‡a</sup> Zhenkun Zhu,<sup>a</sup> Tonghui Guo,<sup>a</sup> Yangzhou Wang,<sup>b</sup> Lijun Chen,<sup>b</sup> Yidong Ming,<sup>c</sup> Jinhua Li,<sup>c</sup> Guanqi Tang,<sup>\*b</sup> and Qidong Tai<sup>\*a</sup>

*a. The Institute of Technological Sciences, Wuhan University Wuhan 430072, P. R. China.*

*b. Research Institute of Frontier Science, Southwest Jiaotong University, Chengdu 610500, P. R. China.*

*c. School of Materials Science and Engineering, Hubei University, Wuhan 430062, P. R. China.*

*\*Corresponding author: Qidong Tai and Guanqi Tang, E-mail: [qdtai@whu.edu.cn](mailto:qdtai@whu.edu.cn) and [guanqitang13@swjtu.edu.cn](mailto:guanqitang13@swjtu.edu.cn)*

<sup>‡</sup> These authors contributed equally to this work.

### Experimental section

#### Materials

Ammonium persulphate (APS) and Tetrabutylammonium hydroxide (TBAOH) was purchased from Innochem. Nickel nitrate hexahydrate (Ni(NO<sub>3</sub>)<sub>2</sub>·6H<sub>2</sub>O), Isopropyl alcohol (IPA, 99.7%), anhydrous ethanol (99.5%), toluene and Bathocuproine (BCP, 96%) were obtained from Alfa Aesar. DMF (99.9%), DMSO (99.9%) and chlorobenzene (CB, 99.9%) were purchased from Sigma-Aldrich. Flexible ITO/PET (25-35 Ω/cm<sup>2</sup>, 125 μm), Lead iodide (PbI<sub>2</sub>, 99.999%), formamidinium iodide (FAI), cesium iodide (CsI), and phenyl-C61-butyric acid methyl ester (PC<sub>61</sub>BM, 99.9%) were bought from Advanced Election Technology. Lead bromide (PbBr<sub>2</sub>, 99.999%), methylammonium bromide (MABr), and PTAA were purchased from Xi'an Yuri Solar Co., Ltd. All starting materials were obtained from commercial suppliers without further purification.

#### Synthesis of NiO<sub>x</sub> and NiO<sub>x</sub>-APS nanoparticles (NPs)

The Ni(NO<sub>3</sub>)<sub>2</sub>·6H<sub>2</sub>O (50 mmol) was dissolved in 50 mL deionized water. Subsequently, 50 mL TBAOH was added drop wisely under vigorous stirring. The resulting precipitates were collected by centrifugation and washed with deionized water 4 times to remove residual TBAOH. The washed precipitates were vacuum-dried at 100°C for 12 h, followed by sintering at 270°C for 2 h to obtain NiO<sub>x</sub> NPs.

The Ni(NO<sub>3</sub>)<sub>2</sub>·6H<sub>2</sub>O (50 mmol) and APS (0.15 mmol (0.3 mol%)) was dissolved in

50 mL deionized water. Subsequently, 50 mL TBAOH was added drop wisely under vigorous stirring. The resulting precipitates were collected by centrifugation and washed with deionized water 4 times to remove residual TBAOH, APS and its by-products. The washed precipitates were vacuum-dried at 100°C for 12 h, followed by sintering at 270°C for 2 h to obtain NiO<sub>x</sub>-APS NPs.

### ***Solar cell fabrication***

First, the NiO<sub>x</sub> NPs or NiO<sub>x</sub>-APS NPs were dispersed in deionized water and IPA (4:1) to prepare 5 mg/mL NiO<sub>x</sub> or NiO<sub>x</sub>-APS solution and filtered with a 0.45 μm nylon filter. The NiO<sub>x</sub> or NiO<sub>x</sub>-APS solution was spin-coated on the ITO/PET substrates at 4000 rpm for 30 s and annealed on a hotplate at 100°C for 30 min in air. PTAA (0.5 mg/mL in Toluene) was coated on NiO<sub>x</sub> or NiO<sub>x</sub>-APS films at 6000 rpm for 40 s and then annealed at 100°C for 10 min. For deposition of perovskite layer, The (1.4 M) perovskite precursor solution was constructed by mixing PbI<sub>2</sub>, PbBr<sub>2</sub>, FAI, MABr, and CsI in a mixed solvent (DMF/DMSO=4/1) according to a formula of Cs<sub>0.05</sub>(FA<sub>0.95</sub>MA<sub>0.05</sub>)<sub>0.95</sub>Pb(I<sub>0.95</sub>Br<sub>0.05</sub>)<sub>3</sub>. The precursor solution was dripped onto HTL-coated substrates and spin-coated at 5000 rpm for 30 s, 150 μL CB as anti-solvent was dripped on the film at 18 s from the start and then annealed at 100°C for 30 min. After that, the PC<sub>61</sub>BM (20 mg/mL in CB) was coated on the perovskite surface at 5000 rpm for 30 s and annealed at 100°C for 10 min, then the BCP solution (0.5 mg/mL in IPA) was spin-coated at 4000 rpm for the 30 s on the PCBM layer. Finally, 200 nm thickness of Ag electrode was deposited by thermal evaporation as an electrode using a shadow mask.

### ***Characterizations***

The TEM images were taken on JEM-2100 (HR), JEOL Co.Ltd. The XRD patterns were obtained with Smartlab 9kW X-ray diffractometer and with Cu Kα (λ = 1.5406 Å) radiation source. The Raman spectrum was prepared by Raman spectrometer (New Mills, UK). The XPS and UPS characterizations were performed on a Thermo Fisher ESCALAB 250XI (USA), with -5 V bias for UPS measurement. The atomic force microscopy (AFM, Bruker Dimension ICON) instrumented c-AFM and KPFM of NiO<sub>x</sub> films. The morphology of samples was acquired by field-emission scanning electron

microscope (FE-SEM, Hitachi SU8010). The UV-Vis absorption spectra were obtained from a UV-2600 spectrophotometer (Shimadzu, Japan). The contact angle of the surface was measured by a video-based automatic contact angle measuring instrument (OCA15, Data Physics). The electrochemical impedance spectra (EIS) were recorded by electrochemical workstation (Zahner, Germany). The current density-voltage ( $J$ - $V$ ) curves of the perovskite solar cells were obtained by a Keithley 2400 source under AM 1.5 G simulated irradiation ( $100 \text{ mW cm}^{-2}$ ) from a solar simulator (Newport 94023A) and then obtain the indoor  $J$ - $V$  curve by altering the illuminance to 1000, 500 and 200 lux using the illuminance meter (ENLITECH) with fluorescent lamps (ILS-30).

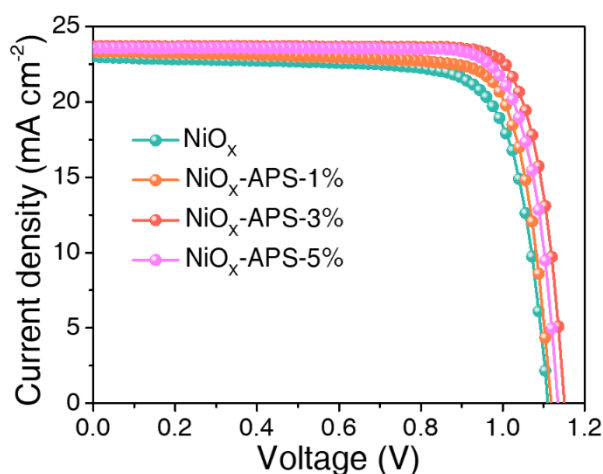

Figure S1.  $J$ - $V$  curves of F-PSCs based on different concentrations of APS assisted synthesized  $\text{NiO}_x$ -APS.

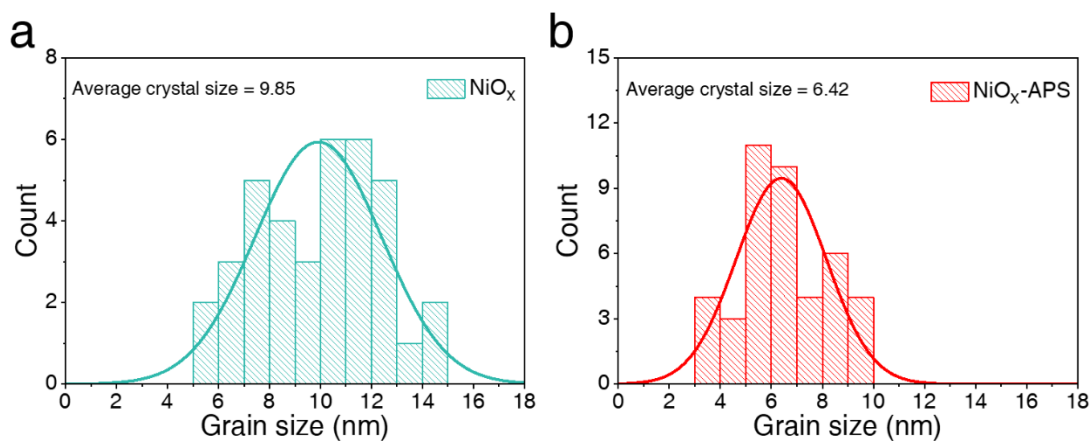

Figure S2. The statistical crystal grain size distribution of  $\text{NiO}_x$  (a) and  $\text{NiO}_x$ -APS (b).

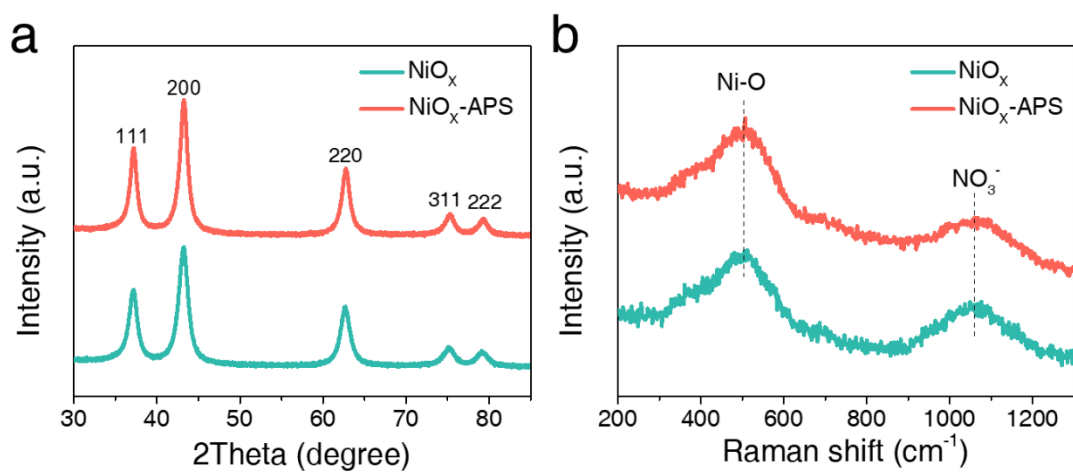

Figure S3. XRD patterns (a) and Raman spectrum (b) of the NiO<sub>x</sub> and NiO<sub>x</sub>-APS NPs.

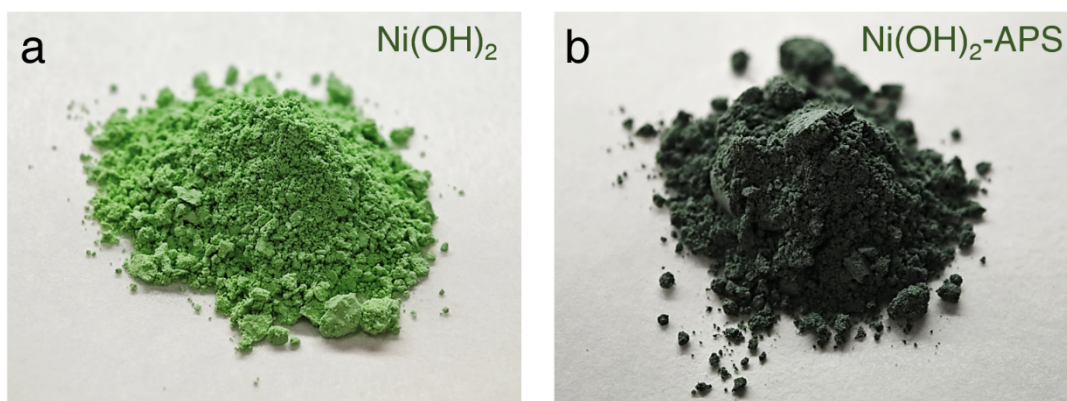

Figure S4. Photographs of Ni(OH)<sub>2</sub> (a) and Ni(OH)<sub>2</sub>-APS (b).

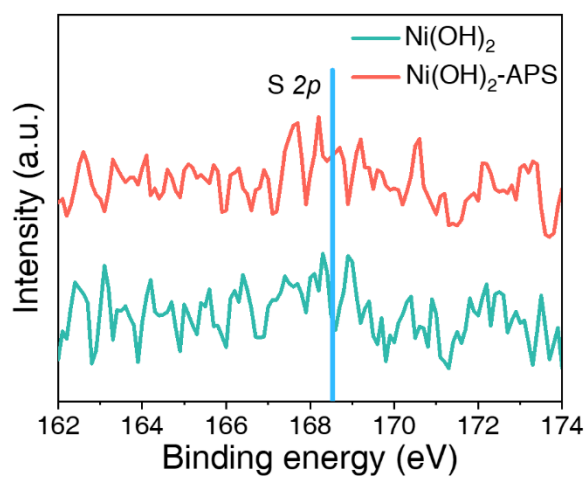

Figure S5. XPS S 2P spectra of Ni(OH)<sub>2</sub>-APS NPs.

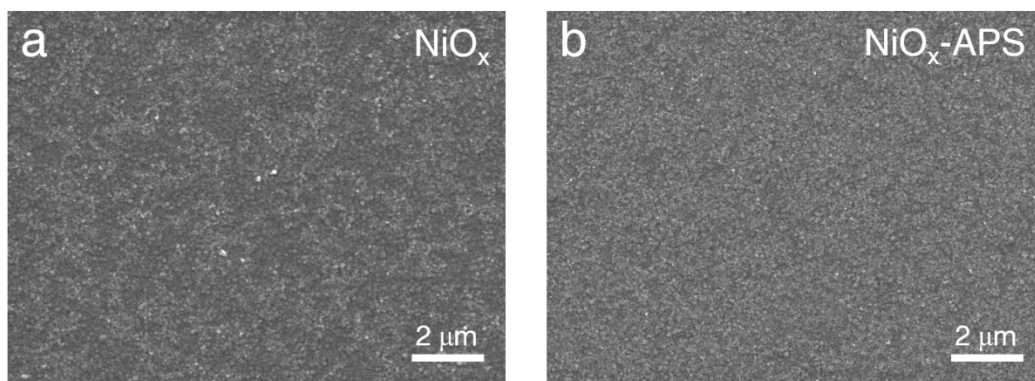

Figure S6. SEM images of NiO<sub>x</sub> (a) and NiO<sub>x</sub>-APS (b) films.

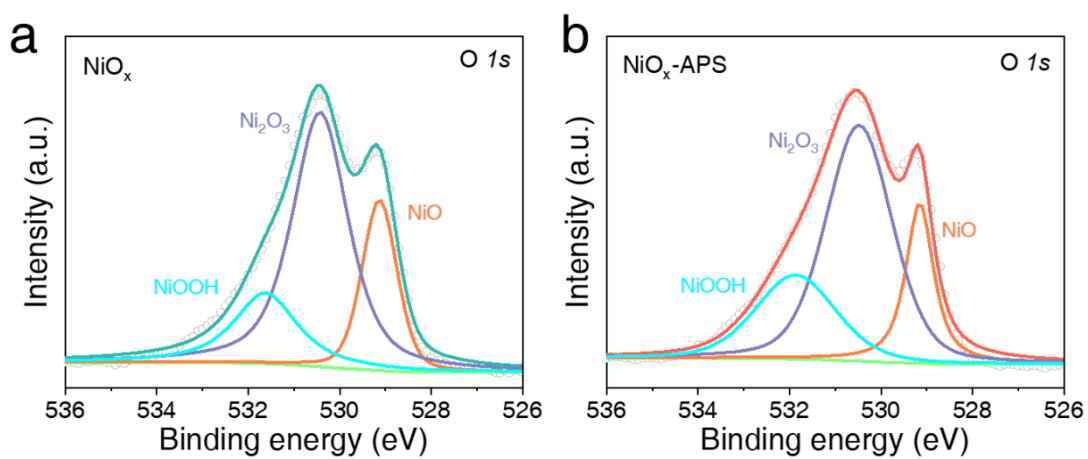

Figure S7. XPS O *1s* spectra of NiO<sub>x</sub> and NiO<sub>x</sub>-APS films.

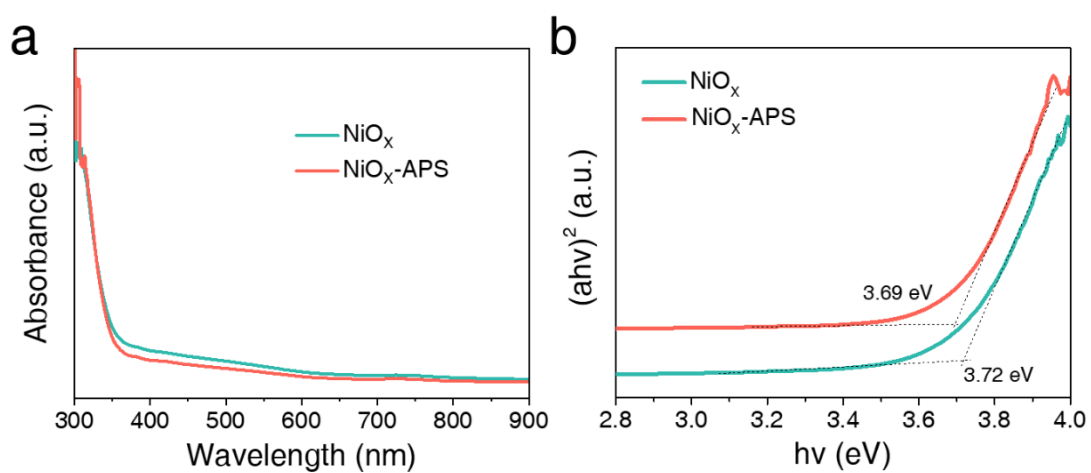

Figure S8. a) UV-vis absorption spectra of NiO<sub>x</sub> and NiO<sub>x</sub>-APS films. b) Tauc plot showing an optical bandgap of NiO<sub>x</sub> and NiO<sub>x</sub>-APS films.

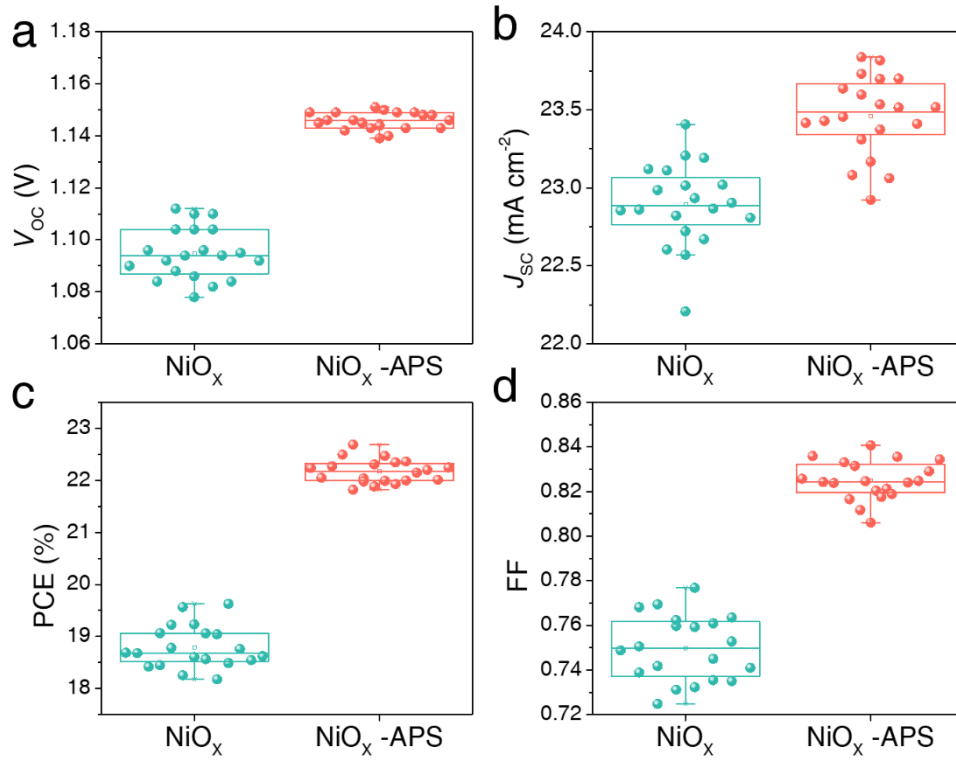

Figure S9. Photovoltaic parameters statistics distribution of  $V_{OC}$ ,  $J_{SC}$ , PCE, and FF for the F-PSCs based on  $\text{NiO}_x$  and  $\text{NiO}_x$ -APS HTLs.

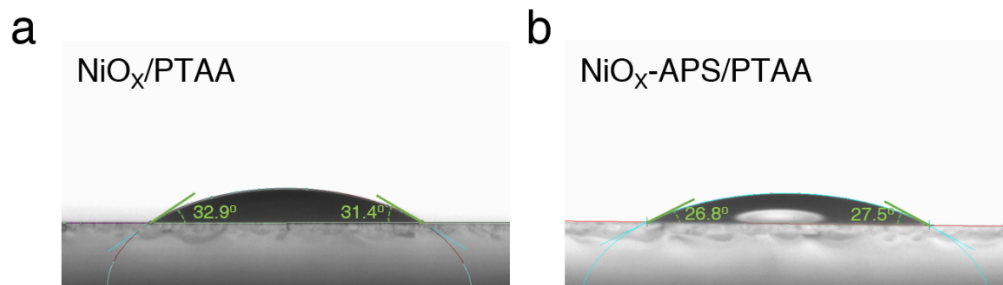

Figure S10. The contact angle of perovskite precursor solution on the surface of  $\text{NiO}_x$  and  $\text{NiO}_x$ -APS films.

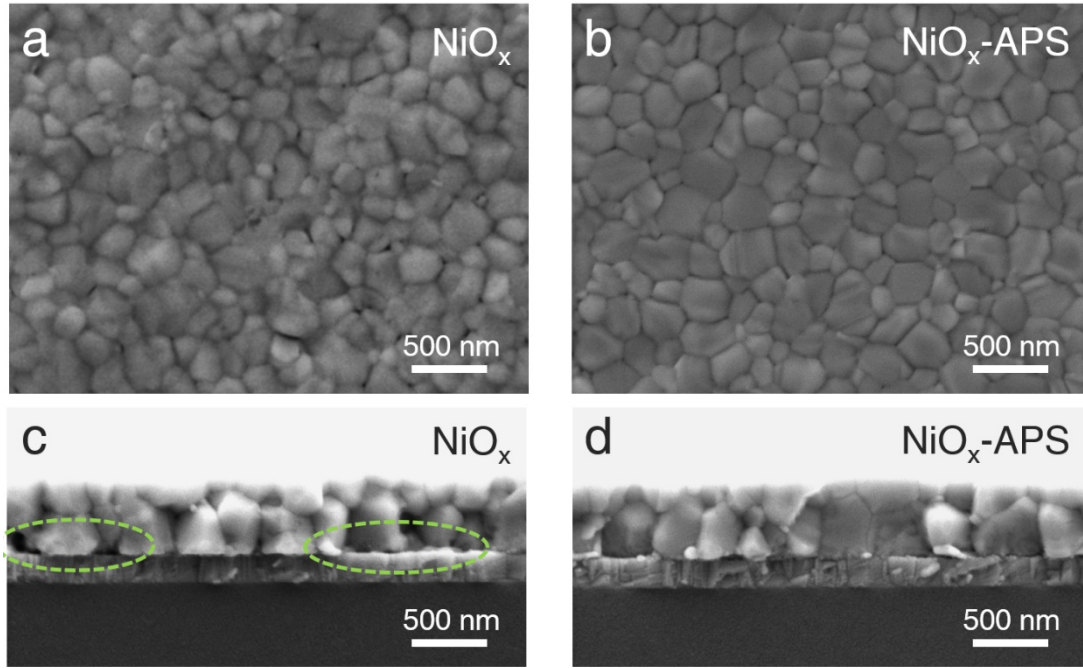

Figure S11. Top-view and cross-section SEM images of the perovskite films deposited on  $\text{NiO}_x$  and  $\text{NiO}_x$ -APS films. (Due to the difficulty in preparing cross-sectional samples for flexible films, the cross-sectional sample was prepared on an ITO/glass substrate.)

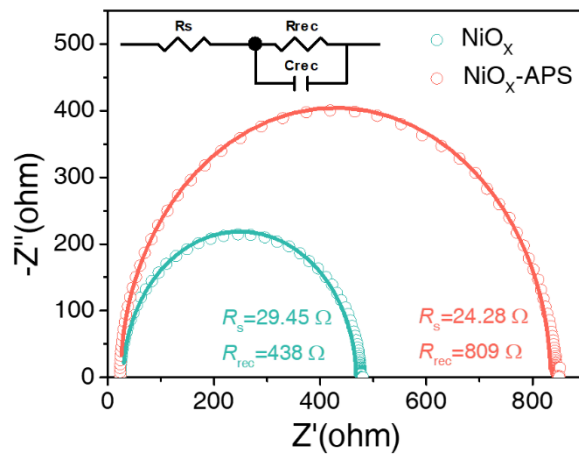

Figure S12. Nyquist plots of the F-PSCs based on  $\text{NiO}_x$  and  $\text{NiO}_x$ -APS HTLs, measured with a bias voltage of 1 V in dark condition. Inset: equivalent circuit model.

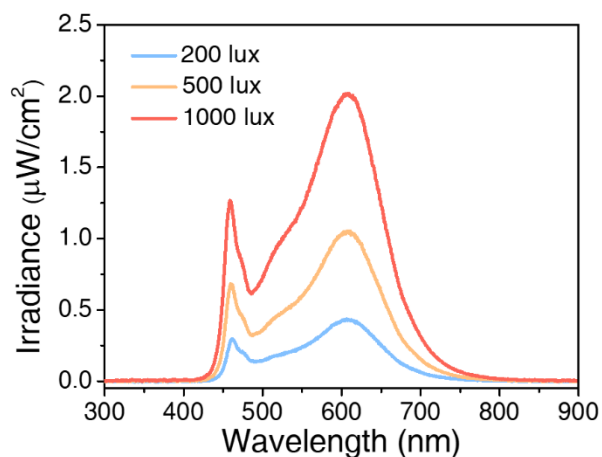

Figure S13. The spectra of 3000 K LED light at 1000 lux, 500 lux, and 200 lux illuminances.

Table S1 Summary of device performance for F-PSCs based on different concentrations of APS assisted synthesized NiO<sub>x</sub>-APS.

| Device                   | $V_{OC}(V)$ | $J_{SC}(mA/cm^2)$ | PCE(%) | FF(%) |
|--------------------------|-------------|-------------------|--------|-------|
| NiO <sub>x</sub>         | 1.110       | 23.02             | 19.63  | 76.82 |
| NiO <sub>x</sub> -APS-1% | 1.119       | 23.35             | 20.86  | 79.83 |
| NiO <sub>x</sub> -APS-3% | 1.149       | 23.70             | 22.68  | 83.28 |
| NiO <sub>x</sub> -APS-5% | 1.136       | 23.59             | 21.76  | 81.19 |

Table S2 Photovoltaic parameters for champion F-PSCs based on NiO<sub>x</sub> and NiO<sub>x</sub>-APS HTLs.

| Device                   | $V_{OC}(V)$ | $J_{SC}(mA/cm^2)$ | PCE(%) | FF(%) |
|--------------------------|-------------|-------------------|--------|-------|
| NiO <sub>x</sub> _RS     | 1.110       | 23.02             | 19.63  | 76.82 |
| NiO <sub>x</sub> _FS     | 1.090       | 23.02             | 18.54  | 73.89 |
| NiO <sub>x</sub> -APS_RS | 1.149       | 23.70             | 22.68  | 83.28 |
| NiO <sub>x</sub> -APS_FS | 1.149       | 23.70             | 22.54  | 82.77 |



Table S3 Summary of F-PSCs with NiO<sub>x</sub> HTMs in recent years.

| Device architecture                                                                                                                                                                               | $V_{OC}$<br>[V] | $J_{SC}$<br>[mA cm <sup>-2</sup> ] | PCE<br>[%] | FF [%] | Ref.      |
|---------------------------------------------------------------------------------------------------------------------------------------------------------------------------------------------------|-----------------|------------------------------------|------------|--------|-----------|
| PEN/ITO/NiO <sub>x</sub> /Cs <sub>0.05</sub> (MA <sub>0.15</sub> FA <sub>0.85</sub> ) <sub>0.95</sub> Pb(Br <sub>0.15</sub> I <sub>0.85</sub> ) <sub>3</sub> /PC <sub>61</sub> BM/BCP/Ag          | 1.11            | 23.50                              | 21.08      | 80.76  | 1         |
| PET/ITO/NiO <sub>x</sub> /Cs <sub>0.05</sub> MA <sub>0.05</sub> FA <sub>0.9</sub> PbI <sub>0.95</sub> Br <sub>0.05</sub> /PC <sub>61</sub> BM/BCP/Ag                                              | 1.12            | 21.79                              | 19.17      | 79     | 2         |
| PET/ITO/NiO <sub>x</sub> /Poly(LA)/Cs <sub>0.05</sub> (FA <sub>0.92</sub> MA <sub>0.08</sub> ) <sub>0.95</sub> Pb(I <sub>0.92</sub> Br <sub>0.08</sub> ) <sub>3</sub> /PC <sub>61</sub> BM/BCP/Ag | 1.06            | 23.78                              | 19.03      | 76     | 3         |
| PET/ITO/NiO <sub>x</sub> /Cs <sub>0.05</sub> (FA <sub>0.77</sub> MA <sub>0.23</sub> ) <sub>0.95</sub> Pb(I <sub>0.77</sub> Br <sub>0.23</sub> ) <sub>3</sub> /PC <sub>61</sub> BM/BCP/Ag          | 1.230           | 20.90                              | 21.02      | 81.76  | 4         |
| PET/ITO/NiO <sub>x</sub> /PTAA/Cs <sub>0.05</sub> (FA <sub>0.95</sub> MA <sub>0.05</sub> ) <sub>0.95</sub> Pb(I <sub>0.95</sub> Br <sub>0.05</sub> ) <sub>3</sub> /PC <sub>61</sub> BM/BCP/Ag     | 1.172           | 23.89                              | 23.72      | 84.64  | 5         |
| CPI/ITO/Sp-NiO <sub>x</sub> /MeO-2PACz/Cs <sub>0.04</sub> (FA <sub>0.83</sub> MA <sub>0.17</sub> ) <sub>0.96</sub> Pb(I <sub>0.83</sub> Br <sub>0.17</sub> ) <sub>3</sub> /C <sub>60</sub> /Cr/Cu | 1.07            | 19.60                              | 15.52      | 71.96  | 6         |
| PEN/ITO/NiO <sub>x</sub> /2PACz&MeO-2PACz/(CsPbI <sub>3</sub> ) <sub>0.13</sub> (FAPbI <sub>3</sub> ) <sub>0.85</sub> (MAPbBr <sub>3</sub> ) <sub>0.02</sub> /C <sub>60</sub> /BCP/Au             | 1.153           | 23.27                              | 21.96      | 81.83  | 7         |
| PET/ITO/NiO <sub>x</sub> /Cs <sub>0.05</sub> (FA <sub>0.92</sub> MA <sub>0.08</sub> ) <sub>0.95</sub> Pb(I <sub>0.92</sub> Br <sub>0.08</sub> ) <sub>3</sub> /PC <sub>61</sub> BM/BCP/Ag          | 1.097           | 22.62                              | 20.42      | 82.33  | 8         |
| PET/ITO/NiO <sub>x</sub> /PTAA/Cs <sub>0.05</sub> (FA <sub>0.95</sub> MA <sub>0.05</sub> ) <sub>0.95</sub> Pb(I <sub>0.95</sub> Br <sub>0.05</sub> ) <sub>3</sub> /PC <sub>61</sub> BM/BCP/Ag     | 1.149           | 23.70                              | 22.68      | 83.28  | This work |

Table S4 Statistics of performance parameters of champion devices based on NiO<sub>x</sub>-APS HTLs at different light intensities.

| Device | Light source | Pin (μW/cm <sup>2</sup> ) | $V_{OC}$ (V) | $J_{SC}$ (mA/cm <sup>2</sup> ) | PCE(%) | FF(%) |
|--------|--------------|---------------------------|--------------|--------------------------------|--------|-------|
|        | 1000 lux     | 312                       | 0.926        | 0.1472                         | 35.59  | 81.46 |
| Target | 500 lux      | 158                       | 0.858        | 0.0755                         | 32.92  | 80.18 |
|        | 200 lux      | 62                        | 0.812        | 0.0284                         | 28.28  | 76.02 |

## Supplementary References

1. B. Fan, J. Xiong, Y. Zhang, C. Gong, F. Li, X. Meng, X. Hu, Z. Yuan, F. Wang and Y. Chen, *Adv. Mater.*, 2022, **34**, 2201840.
2. S. Zhang, H. Wang, X. Duan, L. Rao, C. Gong, B. Fan, Z. Xing, X. Meng, B. Xie and X. Hu, *Adv. Funct. Mater.*, 2021, **31**, 2106495.
3. J. Yang, W. Sheng, X. Li, Y. Zhong, Y. Su, L. Tan and Y. Chen, *Adv. Funct. Mater.*, 2023, **33**, 2214984.
4. N. Yan, Y. Gao, J. Yang, Z. Fang, J. Feng, X. Wu, T. Chen and S. Liu, *Angew. Chem. Int. Ed.*, 2023, **62**, 202216668.
5. J. Jin, Z. Zhu, Y. Ming, Y. Zhou, J. Shang, S. Wang, X. Cui, T. Guo, D. Zhang, G. Tang, Q. Lin, J. Li, X. Liu, S. Liu, Z. Chen, Z. Hu, H. Meng and Q. Tai, *Nat. Commun.*, 2025, **16**.
6. A. Grabowska, R. Fuentes Pineda, P. Spinelli, G. Soto Pérez, F. A. Vinocour Pacheco and V. Babu, *ACS Appl. Mater. Interfaces*, 2024, **16**, 48676-48684.
7. Y. Xu, F. Fei, X. Dong, L. Li, Y. Li, N. Yuan and J. Ding, *Solar RRL*, 2023, **7**, 2300283.
8. X. Ma, H. Luo, S. Jiang, L. Zheng, H. Xue and X. Li, *ACS Appl. Mater. Interfaces*, 2023, **15**, 38444-38453.
